1 **Metabolite profile and mitochondrial energetics characterize poor early recovery of muscle**  
2 **mass following hind limb unloading in old mice**  
3  
4

5  
6 Xiaolei Zhang<sup>1</sup>, Michelle B. Trevino<sup>2</sup>, Miao Wang<sup>2</sup>, Stephen J. Gardell<sup>2</sup>, Julio E. Ayala<sup>2</sup>, Xianlin  
7 Han<sup>2</sup>, Daniel P. Kelly<sup>2</sup>, Bret H. Goodpaster<sup>1,2</sup>, Rick B. Vega<sup>2</sup>, Paul M. Coen<sup>1,2</sup>  
8

9  
10  
11  
12 **Author affiliations:**

13 <sup>1</sup>Translational Research Institute for Metabolism and Diabetes, Florida Hospital, Orlando, FL  
14 32804, USA.

15 <sup>2</sup>Center for Metabolic Origins of Disease, Sanford Burnham Prebys Medical Discovery Institute,  
16 Orlando, FL 32827, USA.

17 **Address correspondence to:**

18 Paul M. Coen, Ph.D.  
19 Translational Research Institute for Metabolism and Diabetes,  
20 Florida Hospital & Sanford Burnham Prebys Medical Discovery Institute  
21 301 East Princeton Street, Orlando, FL 32804  
22 paul.coen@flhosp.org  
23 Office: 407.303.1306  
Fax: 407.303.7199

24 **Running title:** Disuse atrophy and recovery in aging muscle

25 **Keywords:** Skeletal muscle, disuse atrophy, mitochondria, fatty acid oxidation, insulin  
26 resistance  
27  
28

29 **SUMMARY**

30 The progression of age-related sarcopenia can be accelerated by impaired recovery of muscle  
31 mass following periods of disuse due to illness or immobilization. The molecular underpinnings  
32 of poor recovery of aging muscle following disuse remain largely unknown. However, recent  
33 evidence suggests that mitochondrial energetics may play an important role. Here, we report that  
34 22-24 month old mice with low muscle mass and insulin resistance display poor early recovery  
35 of muscle mass following 10 days of hind limb unloading. We took an unbiased approach to  
36 identify changes in energy metabolism gene expression and metabolite pools and show for the  
37 first time that persistent mitochondrial dysfunction, dysregulated fatty acid  $\beta$ -oxidation and  
38 elevated H<sub>2</sub>O<sub>2</sub> emission underlie poor early recovery of muscle mass following a period of disuse  
39 in old mice. Importantly, this is linked to more severe whole-body insulin resistance. The  
40 findings suggest that muscle fuel metabolism and mitochondrial energetics should be a focus for  
41 mining therapeutic targets to improve recovery of muscle mass following periods of disuse in  
42 older animals.

43

44

45

46

47

48

49

50

51

## 52 INTRODUCTION

53 Skeletal muscle is a highly plastic tissue that can adapt its mass, structure and metabolic capacity  
54 in response to changes in mechanical load. During aging, skeletal muscle exhibits a progressive  
55 loss of mass and strength, also called sarcopenia, and an attenuated adaptive recovery following  
56 atrophy induced by: disuse, immobilization, starvation and glucocorticoid treatment (Dardevet *et*  
57 *al.* 1995; Zarzhevsky *et al.* 2001; Degens & Alway 2003; Hao *et al.* 2011; Magne *et al.* 2011).  
58 The hypertrophic response to functional overload is also blunted with aging (Degens & Alway  
59 2003). Poor recovery of muscle mass and strength, even with exercise training, a potent anabolic  
60 stimuli, has also been reported in older humans following unilateral leg immobilization (Suetta *et*  
61 *al.* 2013). Indeed, the lack of recovery from disuse has been suggested to accelerate sarcopenia in  
62 older adults, a condition that can increase risk of frailty, morbidity and loss of independence  
63 (English & Paddon-Jones 2010). Currently, there are no effective therapies to counteract disuse-  
64 induced muscle atrophy and poor recovery of muscle mass, in part because a detailed  
65 understanding of the mechanisms underlying loss of muscle plasticity with aging are unknown.  
66 In addition, the older population demographic is growing and tends to experience more frequent  
67 and prolonged periods of inactivity, increasing the need for the development of safe and effective  
68 therapeutics.

69 Maintenance of skeletal muscle mass reflects a finely controlled balance between protein  
70 synthesis and degradation. Hypertrophy results from a shift to protein synthesis and the primary  
71 anabolic pathway involves the mammalian target of rapamycin complex 1 (mTORC1). mTORC1  
72 is principally regulated by nutritional cues, insulin/growth factor signaling cascades and  
73 mechanotransduction (Hoppeler 2016). Contractile inactivity induced muscle atrophy is due to  
74 reduced basal and postprandial protein synthesis, also known as anabolic resistance, and elevated

75 protein degradation by ubiquitin/proteasome and autophagy/lysosome pathways (Bonaldo &  
76 Sandri 2013). Protein breakdown is initiated by inflammatory, glucocorticoid, and  
77 myostatin/TGF $\beta$  pathways (Egerman & Glass 2014). While the protein degradation/synthesis  
78 pathways are relatively well characterized, upstream regulation, particularly in the context of  
79 muscle plasticity in aging, is less well understood.

80 Separate lines of investigation have shown that mitochondrial dysfunction occurs in  
81 aging muscle, as evidenced by decreased content, mitochondrial protein synthesis, elevated  
82 reactive oxygen species (ROS) emission and apoptosis, and reduced ATP production, calcium  
83 handling (Joseph *et al.* 2015). Recent evidence also points to mitochondria as an important nexus  
84 of control for acute muscle atrophy during disuse (Powers *et al.* 2012). Rodent studies using  
85 mitochondrial-targeted antioxidants support a crucial role for mitochondrial ROS in mediating  
86 muscle atrophy, through upregulation of ubiquitin-protease enzymes (Min *et al.* 2011; Talbert *et*  
87 *al.* 2013). In addition, a model of increased ROS production, the superoxide dismutase (Sod1)  
88 knockout, shows exacerbated muscle atrophy during aging (Jang *et al.* 2010). Elevated  
89 mitochondrial oxidative stress is purported to stimulate muscle protein breakdown by activating  
90 lysosome-autophagy and ubiquitin-proteasome systems (Grune *et al.* 2003; Li *et al.* 2003;  
91 Aucello *et al.* 2009; Smuder *et al.* 2010) and energetic stress (reduced ATP production) may also  
92 activate the AMP kinase (AMPK)-FoxO3 pathways leading to increased protein degradation  
93 (Greer *et al.* 2007; Romanello *et al.* 2010). Moreover, over-expression of PGC-1 $\alpha$ , a key driver  
94 of mitochondrial biogenesis, can protect muscle mass from acute atrophy due to immobilization  
95 or disuse (Sandri *et al.* 2006; Brault *et al.* 2010; Cannavino *et al.* 2014). Key regulators of  
96 autophagy and mitochondrial fission also regulate muscle mass (Masiero & Sandri 2010;  
97 Romanello *et al.* 2010).

98           Taken together, this body of evidence implicates a central role for mitochondrial  
99 energetics in regulating muscle mass and likely plays a vital role in recovery of muscle mass  
100 following a period of disuse. The goal of this study was to determine whether age-associated  
101 alterations in muscle mass (sarcopenia), mitochondrial function and gene/metabolic profile are  
102 linked with responses to hind limb unloading induced atrophy and recovery during reloading in  
103 adult (6 mo) and old mice (22-24 mo). Our data suggest that dysregulated fatty acid  $\beta$ -oxidation  
104 (FAO) and elevated H<sub>2</sub>O<sub>2</sub> emission from mitochondria likely contribute to compromised  
105 recovery of soleus muscle mass following unloading in old sarcopenic mice.

106

107

108

109

110

111

112

113

114

115

116

117

118

119

120

121 **RESULTS**

122 **Old mice are resistant to recovery of muscle mass following unloading induced muscle**

123 **atrophy.** The overarching goal of the following experiments was to determine whether  
124 alterations in fuel metabolism and mitochondrial energetics are linked to poor recovery of  
125 muscle mass in old mice (22-24 mo), compared to adult mice (6 mo). To assess differences in the  
126 atrophy recovery response of old mice, we used a modified version of the tail suspension hind  
127 limb unloading model to induce hind limb muscle atrophy over a 10-day time course (Morey-  
128 Holton & Globus 2002) as shown in Figure 1A, followed by 3 days of reloading and voluntary  
129 cage ambulation. Body weight was greater in the old mice and decreased slightly during  
130 unloading and reloading in adult and old mice (Figure 1B). There was no significant change in  
131 daily food intake during unloading and reloading in adult and old mice (Figure 1C). As shown in  
132 Fig. 1D, E & F, hind limb muscle groups in the old mice weighed less compared to young mice  
133 consistent with a sarcopenic phenotype. While it is clear from previous reports that a full  
134 recovery of muscle mass and strength may take up to 40 days after unloading (Magne *et al.*  
135 2011), we examined the response following a reloading period of 3 days, a time that others have  
136 shown to be important for induction of anabolic signal transduction and gene transcription (Akt,  
137 p70S6K, 4E-BP1, STAT3) involved in hypertrophy and recovery of muscle mass (Childs *et al.*  
138 2003; Baehr *et al.* 2016). Our goal was to understand the differences in response between adult  
139 and old mice at this key early period during reloading. Unloading induced significant atrophy of  
140 the soleus, gastrocnemius and quadriceps muscle groups in both adult and old animals. The  
141 soleus is a postural muscle consisting predominantly of type IIA and I oxidative myofibers  
142 making it particularly susceptible to unloading induced atrophy. For this reason, we focused our  
143 analysis predominantly on the soleus. The magnitude of soleus muscle loss was similar between

144 adult and old mice. Following 3 days of reloading, significant recovery of soleus mass occurred  
145 in the adult, but not the old mice (Figure 1D). Similar responses were observed for the  
146 gastrocnemius and quadriceps (Figure 1E and 1F).

147 **Whole body insulin action remains suppressed in old mice following unloading and**  
148 **recovery.** Periods of disuse can induce profound whole body and skeletal muscle insulin  
149 resistance. We next examined whether differences in metabolic phenotype may link with the  
150 poor recovery of muscle observed in old mice (Figure 2). For this experiment, we compared  
151 control animals to reloaded animals. As expected, whole body insulin action (slope of blood  
152 glucose response to ITT) was lower in the old compared to adult mice (ANOVA main effect for  
153 age, Figure 2A&B). This was likely due to soleus and gastrocnemius glucose uptake being lower  
154 in the old compared to adult mice (ANOVA main effect for age, Figure 2C & D). Significantly,  
155 we found that whole-body insulin action following reloading was lower in old mice, when  
156 compared to control. This was not the case for adult mice (Figure 2A & B). Insulin stimulated  
157 muscle glucose clearance was similar between control and reloading in both adult and old mice.  
158 However, following reloading, gastrocnemius glucose uptake was significantly greater in adult  
159 compared to old mice which likely contributed to lower whole-body insulin action. Body  
160 composition as assessed by NMR revealed that old mice had lower lean mass and greater fat  
161 mass compared to adult mice (Figure 2 E&F, main effect for age), consistent with a sarcopenic  
162 phenotype. Following unloading/reloading, old mice had greater fat mass and lower lean mass,  
163 changes that again likely contributed to blunted whole body insulin action, and are consistent  
164 with the lack of recovery of individual hind limb muscle mass.

165 Muscle protein synthesis and insulin sensitivity are both very sensitive to muscle  
166 contractile activity. To determine whether differences in ambulatory cage activity explained

167 differences in muscle recovery and insulin sensitivity between adult and old mice, we examined  
168 cage activity over 3-days of the recovery period (Figure 2G). Generally, both the adult and old  
169 mice similarly recovered night and day total ambulatory cage activity, albeit in some cases (Day  
170 1, for example) the reloaded animals were more active compared to controls.

171 **Inhibition of the AKT/mTOR/FOXO3a pathway in hind-limb unloaded old mice was not**  
172 **rescued by reloading.** Maintenance of skeletal muscle mass is a finely controlled balance  
173 between protein synthesis and degradation. We next examined the basal phosphorylation status  
174 of key mediators of protein synthesis and degradation in the soleus. The AKT/mTOR pathway  
175 was inhibited following unloading in both adult and old mice as evidenced by reduced serine  
176 phosphorylation of AKT (Ser473), mTOR (Ser2448) and S6 (Ser240/244). Strikingly, inhibition  
177 of the AKT/mTOR pathway was rescued by reloading in the adult mice, but not in the old mice  
178 (Figure 3A). Forkhead box O3 (FOXO3a) is a transcription factor that regulates the muscle  
179 atrophy program. Under catabolic conditions, inhibition of AKT results in dephosphorylation  
180 and nuclear translocation of FOXO3a, which activates the expression of Atrogin-1. Consistent  
181 with this role, we found that FOXO3a was dephosphorylated (Ser253) during unloading in both  
182 adult and old mouse soleus. Accordingly, the expression E3 ligases Atrogin-1 and Murf-1 were  
183 also elevated during atrophy. However, FOXO3a remained dephosphorylated and Atrogin-1 and  
184 Murf-1 tended to remain elevated in the old mice during recovery, compared to the adults  
185 (Figure 3B).

186 The ratio of LC3BI/II, an index of LC3B lipidation and autophagy activation, was  
187 elevated during unloading and reduced with recovery in adult and old mice (Figure 3C). Similar  
188 trends were seen for ATG7 and PINK which are proteins involved in mitophagy. PINK1, a  
189 protein thought to protect cells from stress-induced mitochondrial dysfunction, remained



190 elevated during reloading in the old mice (Figure 3C). Taken together, these data show that the  
191 key regulators of protein synthesis and degradation respond as expected during unloading in both  
192 adult and old mice. However, following 3 days of reloading, there is persistent activation of  
193 protein degradation and inhibition of protein synthesis mediators in old mice.

194 **Mitochondrial function does not improve during recovery in old mice.** Our central  
195 hypothesis is that alterations in mitochondrial energetics and fuel metabolism play a key role in  
196 the poor recovery of muscle mass in older animals. Functional assays of soleus mitochondria  
197 were conducted using saponin permeabilized myofiber bundles, an approach that preserves the  
198 native reticular structure of the mitochondria (Picard *et al.* 2011). When compared to adult,  
199 skeletal myofibers isolated from old control mice displayed lower respiration, OXPHOS content  
200 and calcium retention capacity (CRC), an index of apoptotic susceptibility, while H<sub>2</sub>O<sub>2</sub> emission  
201 was elevated (Figure 4 A-G). Following unloading, LEAK, complex I, I&II and FAO supported  
202 OXPHOS respiration and CRC in soleus were all reduced in both the adult and old mice. In  
203 addition, mitochondrial H<sub>2</sub>O<sub>2</sub> emission was elevated in both young and aged animals (Figure 4  
204 A-F). Total cardiolipin and OXPHOS protein (measures of mitochondrial content) were both  
205 reduced with unloading in the adult mice, but remained unchanged in the older animals  
206 indicating that changes in function were independent of changes in mitochondrial content during  
207 unloading in the old animals (Figure 4 G,H&J).

208       Following 3-days of recovery, complex I & II supported mitochondrial respiration, CRC,  
209 and H<sub>2</sub>O<sub>2</sub> emission normalized in the young animals. Interestingly, FAO supported respiration  
210 did not recover in the young animals. Old mice did not recover any aspect of mitochondrial  
211 function as evidenced by sustained elevated H<sub>2</sub>O<sub>2</sub> emission and suppressed CRC and respiration.

212 Taken together, these data indicate that mitochondrial function does not improve during the early  
213 recovery phase in old mice.

214 We used shotgun lipidomics to quantify the cardiolipin pool (Han *et al.* 2006).  
215 Cardiolipin is a phospholipid specific to the inner mitochondrial membrane and critical for ETC  
216 integrity and mitochondrial function (Paradies *et al.* 2014). Cardiolipin species can be broadly  
217 categorized based on acyl chain length and degree of saturation, into: immature, mature and  
218 remodeled species. Immature cardiolipins are those that have heterogeneous acyl chain length  
219 and degree of saturation and typically contain one or more 16:1 acyl chains. Mature cardiolipins  
220 have more uniform acyl chain length and degree of saturation, for example, tetralinolyol  
221 cardiolipin (18:2-18:2-18:2-18:2). Remodeled cardiolipin species contain greater PUFA  
222 (typically 22:6) acyl chains and may have been remodeled due to oxidative insult (Chicco &  
223 Sparagna 2007). The soleus of older animals had slightly lower content of many cardiolipin  
224 species, again likely due to reduced mitochondrial content with aging (Figure 4I and Table 1S).  
225 Unloading elicited a striking reduction in many immature, mature and remodeled species of  
226 cardiolipin in adult mice. There was a partial recovery following reloading. The same dynamic  
227 response of the cardiolipin pool was not evident in the older mice.

228 **Divergent metabolomic response between adult and old mice during unloading and**  
229 **recovery.** Targeted metabolomic profiling was conducted on soleus samples to quantify  
230 acylcarnitines, organic acids and amino acids in order to assess perturbations in mitochondrial  
231 fuel metabolism that may occur with unloading and reloading. We show for the first time a  
232 striking decrease in long-chain acylcarnitines during unloading in the adult animals (Figure 5A  
233 and Table 2S), in-line with the observations of others who have shown that contractile inactivity  
234 induces a switch to carbohydrate fuel source and reductions in fatty acid oxidation (Bergouignan

235 *et al.* 2011). Interestingly, following reloading, acylcarnitines remained suppressed in the adult  
236 mice, consistent with lower FAO supported respiration. However, certain TCA cycle  
237 intermediates (fumarate, malate, and  $\alpha$ -ketoglutarate) and amino acids (Gln, Glu, Ala, and  
238 Citrulline), increased during reloading in the adult soleus, consistent with increases in  
239 TCA/CI&II supported respiration (Figure 5 B&C and Table 3&4S). These data suggest that FAO  
240 remains suppressed during the early reloading phase in adult muscle and that recovery of  
241 mitochondrial respiration is supported by glycolysis and TCA cycle anaplerosis via amino acids.  
242 The increase in C4, and C5 acylcarnitines during reloading are also consistent with increased  
243 amino acid catabolism and anaplerosis (Table 2S). In old mice, the metabolomic profile in  
244 response to unloading and reloading was distinctly different from that of the adult animals. The  
245 majority of long-chain acylcarnitines increased during unloading and reloading in the old mice  
246 (Figure 5A). This, in concert with reduced TCA cycle intermediates and reduced capacity for  
247 respiration, suggest that FAO outpaced TCA flux and resulted in accumulation of acylcarnitine  
248 species. Interestingly, many of the amino acids that were increase upon reloading in the adult  
249 animals did not rise in the older animals (Figure 5C).

250 **Transcriptomic response to unloading and reloading is similar in adult and old mice.** Gene  
251 expression profiling was conducted on soleus samples from the 6 groups using RNA sequencing.  
252 Our goal was to determine whether the divergent mitochondrial energetic and fuel metabolic  
253 responses to unloading and particularly reloading in old mice were underpinned by a distinct  
254 transcriptomic response. A summary of the number of differentially regulated genes is presented  
255 in Table 7S. The database for annotation, visualization and integrated discovery (DAVID) v6.8  
256 was used to identify enriched biological themes via functional annotation (Dennis *et al.* 2003).  
257 The top significantly up- and down-regulated functional category terms for each group

258 comparison are presented in Supplemental Tables 8-11S. Terms related to mitochondrial  
259 function and fuel metabolism were downregulated in during unloading for both adult and old  
260 mice (Table 8&9S). Surprisingly, mitochondria related terms were also significantly  
261 downregulated during reloading for adult and old mice (Table 10&11S). These findings were  
262 confirmed by qRT-PCR assay for expression of key nuclear transcription factors that drive  
263 mitochondrial energy metabolism, including: *Ppargc1a* (PGC-1 $\alpha$ ), *Esrrg* (ERR $\gamma$ ), and *Esrra*  
264 (ERR $\alpha$ ) (Figure 6A).

265 We next compared the collective results of the transcriptomic and metabolomic profiling.  
266 This comparative analysis is depicted by heat maps (Figure 6B&C) which display the direction  
267 of differential expression. The analysis was restricted to a subset of genes involved in  
268 mitochondrial fuel and energy metabolism relevant to the metabolites measured in the targeted  
269 metabolomics profile. This comparison highlights striking differences in the metabolomic and  
270 transcriptomic responses during the reloading condition for adult and old mice. In adult mice, the  
271 recovery of mitochondrial respiratory capacity occurs along with partial normalization of  
272 metabolites, particularly amino acids and organic acids, but not acylcarnitines. In contrast, FAO,  
273 TCA and ETC genes remained repressed. In old mice, the metabolite response during recovery is  
274 distinctly different. Namely, acylcarnitines were elevated while organic acids and amino acids  
275 remained low. Moreover, FAO, TCA and ETC genes remained repressed. Taken together, these  
276 results indicate that mitochondrial energetics gene and metabolite profiles are repressed in  
277 concert with unloading and muscle atrophy. However, metabolite levels clearly distinguish the  
278 early muscle hypertrophy response in adult animals versus the lack of recovery in old animals  
279 upon reloading and to a far greater degree than mitochondrial energetics gene profiles.

280

281 **DISCUSSION**

282 During aging, skeletal muscle exhibits a progressive loss of mass and strength known as  
283 sarcopenia (Rosenberg 1989), and an attenuated ability to recover muscle mass following acute  
284 periods of disuse or unloading. Poor recovery of muscle mass following periods of disuse is a  
285 significant health concern for older adults that leads to lower activities of daily living and  
286 increased risk of frailty and mobility disability. The mechanisms responsible for the lack of  
287 muscle mass recovery in old mice following disuse have not been fully elucidated but are likely  
288 complex and multifactorial. Investigations to date have focused on attenuated protein synthesis  
289 possibly due to ER stress and impaired neuromuscular transmission (Baehr *et al.* 2016). In  
290 separate lines of investigation, aging has also been linked with insulin resistance and  
291 mitochondrial dysfunction in skeletal muscle (Konopka & Sreekumaran Nair 2013). Here, we  
292 report that 22-24 month old mice with low muscle mass and insulin resistance, display poor early  
293 recovery of muscle mass following 10 days of hind limb unloading. We took an unbiased  
294 approach to identify changes in energy metabolic gene expression and metabolite pools and  
295 show for the first time that persistent mitochondrial dysfunction and a dysregulated metabolic  
296 response underlie poor early recovery of muscle mass in old mice. Importantly, this is linked to  
297 worsened whole-body insulin resistance. Our results demonstrate the power of using unbiased  
298 molecular profiling to define signatures of complex physiological states combined with deep  
299 phenotyping of mitochondrial energetics.

300 Physical inactivity results in attenuated mitochondria capacity along with a shift in fuel  
301 selection to carbohydrate and suppressed FAO (Bergouignan *et al.* 2011). Here, in adult mice,  
302 we show a distinct remodeling of soleus mitochondrial energetics and fuel metabolism during  
303 unloading as evidenced by reduced respiration, elevated H<sub>2</sub>O<sub>2</sub> emission and reduced long-chain

304 acylcarnitines and organic acids. This change in mitochondrial phenotype occurred along with  
305 striking reductions in many individual molecular species of cardiolipin. Indeed, synthesis and  
306 remodeling of cardiolipin is crucial for the structural and functional integrity of the  
307 mitochondria. Our findings expand upon the work of Ostojic et al., others who reported  
308 decreased cardiolipin during muscle atrophy (Ostojic *et al.* 2013).

309         Insulin signaling intersects with protein synthesis and degradation pathways via  
310 AKT/FOXO/mTOR. Hence, a logical supposition is that baseline insulin resistance worsens  
311 muscle atrophy response during disuse. Similarly, mitochondrial dysfunction and ROS emission  
312 are linked to activation of protein degradation pathways and may worsen muscle atrophy due to  
313 disuse (Romanello & Sandri 2010). Indeed, older adults with type 2 diabetes, a condition defined  
314 by muscle insulin resistance and mitochondrial dysfunction, have an accelerated loss of muscle  
315 mass over time (Park *et al.* 2009), indicating a propensity for catabolic metabolism. However, we  
316 found that insulin resistant old mice with mitochondrial dysfunction did not have an exacerbated  
317 muscle atrophy during disuse. The relative magnitude of muscle loss and alterations in the  
318 activity (phosphorylation state) of AKT/mTOR/FOXO3a, and the majority of endpoint  
319 measurements were similar in adult and old animals in response to unloading. These findings  
320 suggest that the presence of insulin resistance or mitochondrial dysfunction in aging does not  
321 influence the muscle atrophy response due to disuse or unloading.

322         Although impaired recovery by aged muscle is reasonably well documented, the  
323 mechanisms responsible for the lack of growth are not clearly defined. We show for the first time  
324 that impaired early recovery of muscle mass may be exacerbated by insulin resistance and  
325 persistent mitochondrial dysfunction in old animals. In stark contrast to adult mice, there was no  
326 change in the cardiolipin species of old mice that likely contributed to persistent mitochondrial

327 dysfunction. Cardiolipin synthesis and remodeling is critical for correct cristae folding and  
328 functional integrity of the ETC complexes. The increase in acylcarnitines (long chain in  
329 particular) in concert with reductions in particular TCA cycle organic acids (fumarate and  
330 malate), and no change in pyruvate or lactate, suggest a bottleneck in carbon flux from  $\beta$ -  
331 oxidation into the TCA cycle which could reduce the capacity to generate the reducing  
332 equivalents needed to produce ATP contributing to the anabolic response. The change in muscle  
333 metabolite pools during reloading in old mice is similar to that observed with high fat feeding  
334 and obesity (Koves *et al.* 2008). In addition, the metabolite profile served to robustly distinguish  
335 the phenotype of poor muscle recovery in old mice. Our findings are also in line with  
336 observations that insulin resistance, obesity, and elevated plasma free fatty acids are linked with  
337 blunted amino acid stimulated muscle protein synthesis (Murton *et al.* 2015; Stephens *et al.*  
338 2015). Further studies are needed to examine whether alterations in mitochondrial fatty acid  
339 import or FAO may impact early recovery of muscle in old mice, potentially via improved  
340 insulin sensitivity.

341         Interestingly, while metabolite profile distinguished the phenotype of poor muscle  
342 recovery in old mice, transcriptomic profiles for energy metabolic pathways were similar  
343 between old and adult mice during unloading and reloading. In addition, the recovery of  
344 mitochondrial respiratory capacity in adult mice occurred along with partial recovery of  
345 metabolites, while FAO, TCA and ETC genes remain repressed. Indeed, FAO genes appeared to  
346 be further repressed during unloading in adult mice. These data suggest that the early recovery of  
347 mitochondrial function following reloading is, seems to be independent of FAO and mediated by  
348 cardiolipin remodeling and alterations in metabolite profile. This, in turn, could affect post  
349 translational modification and activity of ETC, although this remains to be tested. Taken

350 together, these results indicate that mitochondrial energetics, gene and metabolite profiles are  
351 repressed in concert with unloading and muscle atrophy.

352 In summary, our data suggest that dysregulated FAO and elevated H<sub>2</sub>O<sub>2</sub> emission from  
353 mitochondria likely contribute to the lack of recovery of soleus muscle mass following unloading  
354 in sarcopenic mice. These findings suggest that pathways governing muscle fuel metabolism and  
355 mitochondrial energetics might harbor promising therapeutic targets for improving the recovery  
356 of muscle mass following periods of disuse in older patients.

357

358

359

360

361

362

363

364

365

366

367

368

369

370

371

372



373 **EXPERIMENTAL PROCEDURES**

374 **Animals.** All animal experiments and euthanasia protocols were conducted in strict accordance  
375 with the National Institute of Health guidelines for humane treatment of animals and approved  
376 by the Institutional Animal Care and Use Committee at the Sanford-Burnham Medical Research  
377 Institute at Lake Nona. 6-month and 22-24 month old male C57BL/6J mice were obtained from  
378 the National Institute on Aging rodent colony (Charles River Laboratories, Madison, WI). Young  
379 and aged animals were divided into the following experimental groups: 10-day of hind limb  
380 unloading (UN), 10-day of hind limb unloading followed by 3 days of reloading recovery (RL),  
381 and control (CON). Mice were fed ad libitum with a standard chow diet (#2916, Harlan-Teklad,  
382 Houston, Tx) and water/hydrogel (ClearH<sub>2</sub>O, Westbrook, ME, US) and housed at 22C with a 12-  
383 h light/dark cycle.

384 **Tail suspension hind limb unloading.** Tail suspension is the one of the most commonly used  
385 animal models of musculoskeletal non-weight bearing. Prior to tail suspension experiments the  
386 individual mice acclimated in single cages and routine handling for 3 days. Tail suspension was  
387 performed using a modified version of the Morey-Holton and Globus protocol (Morey-Holton &  
388 Globus 2002). Briefly, a small metallic hook is taped to the base of the tail using non-abrasive  
389 adhesive tape wrapped in a helical pattern. The hook is then attached to a small swivel key chain  
390 that is attached to a metal rod that runs the length of the microisolator cage. The mice could  
391 move on a y-axis and rotate 360 degrees and so had access to all areas of the cage. The hind  
392 limbs are maintained just off the cage floor with the body of the mouse at ~30° angle from the  
393 cage floor. The mice can move freely and the angle and height of the mice are checked daily.  
394 The control mice were separated into the individual cages with the exactly the same conditions  
395 as unloading groups, but without tail suspension.

396 After 10 days of UN, RL, or CON, the mice were fasted for 4 hours and sacrificed by  
397 CO<sub>2</sub> asphyxiation and cervical dislocation, or anesthetized with sodium pentobarbital (IP  
398 administration, 50mg/kg) for muscle harvested for metabolomics analysis. The soleus,  
399 gastrocnemius, and quadriceps femoris muscle groups were immediately harvested and weighed.  
400 The soleus muscle from right hind limb was used for fresh tissue assay immediately and other  
401 muscles were snap-frozen in liquid nitrogen for other analysis.

402 **Cardiometabolic Phenotyping.** *Body Composition.* Measurement of fat and lean mass (g) is  
403 accomplished using a LF90II TD-NMR (Bruker, Madison, WI). Conscious mice are placed in a  
404 plastic restraint tube that is inserted into the instrument. Measurements are obtained in less than 1  
405 minute. *Ambulatory cage activity.* Locomotor activity measurements are obtained using a  
406 Promethion Mouse Multiplexed Metabolic System (Sable Systems International, Las Vegas,  
407 NV). Body mass is collected using a housing cubby connected to a precision scale. Locomotor  
408 activity along the X, Y and Z planes is measured using infrared beams that span the home cage.  
409 Data are collected by a host computer. *Insulin-stimulated Tissue Glucose Uptake,* was assessed  
410 as described in the Supplemental Information section. Processing of tissues for glucose uptake  
411 was determined as previously described (Ayala *et al.* 2007), and as detailed in the Supplemental  
412 Information section.

413 **Myofiber Bundle Preparation.** Permeabilized fiber bundles (1-3mg) were prepared  
414 immediately following tissue harvest, as previously described (Coen *et al.* 2015) and as detailed  
415 in the Supplemental Information section.

416 **Mitochondrial respiration.** Respirometry assays were conducted using an Oxygraph-2k  
417 (Oroboros Instruments, Innsbruck, Austria). The myofiber bundles were gently placed into the  
418 respirometer chambers and after a stable baseline was reached, the assay protocol was run in

419 duplicate at 37°C and between 350-200 nmol of O<sub>2</sub> in Buffer Z with blebbistatin (25µM). The  
420 assay protocols are described in the Supplemental Information section.

421 **Mitochondrial H<sub>2</sub>O<sub>2</sub> Emission.** H<sub>2</sub>O<sub>2</sub> emission was measured with Amplex Red reagent which  
422 reacts with H<sub>2</sub>O<sub>2</sub> to produce the stable fluorescent compound resorufin. Resorufin fluorescence  
423 was monitored using a Fluorescence Spectrometer (Perkin Elmer LS50B, Waltham,  
424 Massachusetts, USA) with temperature control (37°C) and magnetic stirring at  
425 excitation/emission 563/587nm. The assay was run with buffer Z containing 5000U/ml CuZn-  
426 SOD, 25µM blebbistatin, 50µM Amplex Ultra-Red, and 6U/ml horseradish peroxidase. Briefly,  
427 the muscle fiber bundles were added to the reaction buffer with 10ug/ml oligomycin, 10mM  
428 Glutamate, 2mM Malate and 10mM Succinate. The rate of emission of H<sub>2</sub>O<sub>2</sub> (pmol) was  
429 calculated from previously established fluorescence intensity standard curves with known  
430 concentrations of H<sub>2</sub>O<sub>2</sub>, after correcting for the rate of change in background fluorescence.  
431 Following each experiment, myofiber bundles were dried and weighed. Rate of H<sub>2</sub>O<sub>2</sub> emission  
432 was expressed as pmol/min/mg dry weight.

433 **Mitochondrial calcium retention capacity.** A continuous, spectrophotometric assay was  
434 utilized to measure mitochondrial calcium retention capacity within soleus fiber bundles, as  
435 detailed in the Supplemental Information section.

436 **RNA Sequencing and Informatics.** Details of sample preparation, library preparation  
437 sequencing, mapping and differential gene expression analysis are described in the Supplemental  
438 Information section. *Heat maps.* The normalized (z-score) mean of each cohort was visualized in  
439 the heatmap, created with the “heatmap.2” function in the “gplots” package within the statistical  
440 program R (<http://www.r-project.org/>). *Gene Ontology (GO) annotation.* The database for  
441 annotation, visualization and integrated discovery (DAVID) v6.8 was used to identify enriched

442 biological themes via gene ontology (GO) annotation. The gene expression data discussed in this  
443 publication have been deposited in NCBI's Gene Expression Omnibus and are accessible  
444 through GEO Series accession number GSE102284.

445 **Real-time quantitative-PCR:** Details of sample preparation and gene expression analysis by  
446 PCR are described in the Supplemental Information section.

447 **Western Blot.** Frozen soleus was prepared for immunoblot as described previous (Lee *et al.*  
448 2017) and as detailed in the Supplemental Information section.

449 **Lipidomics Analysis.** Multi-dimensional mass spectrometry-based shotgun lipidomics (MDMS-  
450 SL) was employed to measure and characterize the lipid patterns in mouse soleus muscle. The  
451 analytical procedures for the lipidomics analysis are detailed in the Supplemental Information  
452 section.

453 **Metabolomics Analysis.** Acylcarnitines, organic acids and amino acids were quantified using  
454 internal calibration standards and mass spectrometry as described in detail in the Supplemental  
455 Information section.

456 **Statistical Analysis.** All data are represented as the mean  $\pm$  SEM. All the statistical analyses  
457 were performed by GraphPad Prism. The differences between groups were conducted using  
458 ANOVA or *t*-test (paired and unpaired) approaches with Tukey's/Bonferroni Multiple  
459 Comparison Test. when appropriate  $p < 0.05$ , it was considered significant.

460

461

462

463

464

465 **ACKNOWLEDGEMENTS/FUNDING**

466 This study was supported by funding from the National Institutes of Health | National Institute on  
467 Aging (K01 AG044437) awarded to PMC. We are grateful for the excellent technical assistance  
468 of the staff at the vivarium, the Cardiometabolic Phenotyping core and the Metabolomics core of  
469 the Sanford Burnham Prebys Medical Discovery Institute at Lake Nona. We are also grateful to  
470 Feng Qi for bioinformatics support and Fanchao Yi for statistics support. The authors have no  
471 conflicts of interest to declare.

472

473 **AUTHORS CONTRIBUTIONS**

474 XZ, MBT, TCL, DPK, XH, SJG, JA, RBV, PMC performed experiments, and analyzed and  
475 interpreted the data. XZ and RBV contributed to data interpretation and writing the manuscript.  
476 All co-authors reviewed and approved the manuscript. PMC contributed to the study concept and  
477 design, statistical analysis, interpretation of the data and wrote the manuscript. PMC is the  
478 guarantor of the data.

479 **REFERENCES**

- 480 Aucello M, Dobrowolny G, Musaro A (2009). Localized accumulation of oxidative stress  
481 causes muscle atrophy through activation of an autophagic pathway. *Autophagy*. **5**,  
482 527-529.
- 483 Ayala JE, Bracy DP, Julien BM, Rottman JN, Fueger PT, Wasserman DH (2007). Chronic  
484 treatment with sildenafil improves energy balance and insulin action in high fat-fed  
485 conscious mice. *Diabetes*. **56**, 1025-1033.
- 486 Baehr LM, West DW, Marcotte G, Marshall AG, De Sousa LG, Baar K, Bodine SC (2016). Age-  
487 related deficits in skeletal muscle recovery following disuse are associated with  
488 neuromuscular junction instability and ER stress, not impaired protein synthesis.  
489 *Aging*. **8**, 127-146.
- 490 Bergouignan A, Rudwill F, Simon C, Blanc S (2011). Physical inactivity as the culprit of  
491 metabolic inflexibility: evidence from bed-rest studies. *Journal of applied physiology*.  
492 **111**, 1201-1210.
- 493 Bonaldo P, Sandri M (2013). Cellular and molecular mechanisms of muscle atrophy.  
494 *Disease models & mechanisms*. **6**, 25-39.
- 495 Brault JJ, Jespersen JG, Goldberg AL (2010). Peroxisome proliferator-activated receptor  
496 gamma coactivator 1alpha or 1beta overexpression inhibits muscle protein  
497 degradation, induction of ubiquitin ligases, and disuse atrophy. *J Biol Chem*. **285**,  
498 19460-19471.
- 499 Cannavino J, Brocca L, Sandri M, Bottinelli R, Pellegrino MA (2014). PGC1-alpha over-  
500 expression prevents metabolic alterations and soleus muscle atrophy in hindlimb  
501 unloaded mice. *J Physiol*. **592**, 4575-4589.
- 502 Chicco AJ, Sparagna GC (2007). Role of cardiolipin alterations in mitochondrial dysfunction  
503 and disease. *American journal of physiology. Cell physiology*. **292**, C33-44.
- 504 Childs TE, Spangenburg EE, Vyas DR, Booth FW (2003). Temporal alterations in protein  
505 signaling cascades during recovery from muscle atrophy. *American journal of*  
506 *physiology. Cell physiology*. **285**, C391-398.
- 507 Coen PM, Menshikova EV, Distefano G, Zheng D, Tanner CJ, Standley RA, Helbling NL, Dubis  
508 GS, Ritov VB, Xie H, Desimone ME, Smith SR, Stefanovic-Racic M, Toledo FG,  
509 Houmard JA, Goodpaster BH (2015). Exercise and Weight Loss Improve Muscle  
510 Mitochondrial Respiration, Lipid Partitioning and Insulin Sensitivity Following  
511 Gastric Bypass Surgery. *Diabetes*.
- 512 Dardevet D, Sornet C, Taillandier D, Savary I, Attaix D, Grizard J (1995). Sensitivity and  
513 protein turnover response to glucocorticoids are different in skeletal muscle from  
514 adult and old rats. Lack of regulation of the ubiquitin-proteasome proteolytic  
515 pathway in aging. *J Clin Invest*. **96**, 2113-2119.
- 516 Degens H, Alway SE (2003). Skeletal muscle function and hypertrophy are diminished in  
517 old age. *Muscle & nerve*. **27**, 339-347.
- 518 Dennis G, Jr., Sherman BT, Hosack DA, Yang J, Gao W, Lane HC, Lempicki RA (2003). DAVID:  
519 Database for Annotation, Visualization, and Integrated Discovery. *Genome biology*. **4**,  
520 P3.
- 521 Egerman MA, Glass DJ (2014). Signaling pathways controlling skeletal muscle mass. *Crit*  
522 *Rev Biochem Mol Biol*. **49**, 59-68.

- 523 English KL, Paddon-Jones D (2010). Protecting muscle mass and function in older adults  
524 during bed rest. *Current opinion in clinical nutrition and metabolic care*. **13**, 34-39.
- 525 Greer EL, Oskoui PR, Banko MR, Maniar JM, Gygi MP, Gygi SP, Brunet A (2007). The energy  
526 sensor AMP-activated protein kinase directly regulates the mammalian FOXO3  
527 transcription factor. *J Biol Chem*. **282**, 30107-30119.
- 528 Grune T, Merker K, Sandig G, Davies KJ (2003). Selective degradation of oxidatively  
529 modified protein substrates by the proteasome. *Biochemical and biophysical  
530 research communications*. **305**, 709-718.
- 531 Han X, Yang K, Yang J, Cheng H, Gross RW (2006). Shotgun lipidomics of cardiolipin  
532 molecular species in lipid extracts of biological samples. *Journal of lipid research*. **47**,  
533 864-879.
- 534 Hao Y, Jackson JR, Wang Y, Edens N, Pereira SL, Alway SE (2011). beta-Hydroxy-beta-  
535 methylbutyrate reduces myonuclear apoptosis during recovery from hind limb  
536 suspension-induced muscle fiber atrophy in aged rats. *Am J Physiol Regul Integr  
537 Comp Physiol*. **301**, R701-715.
- 538 Hoppeler H (2016). Molecular networks in skeletal muscle plasticity. *J Exp Biol*. **219**, 205-  
539 213.
- 540 Jang YC, Lustgarten MS, Liu Y, Muller FL, Bhattacharya A, Liang H, Salmon AB, Brooks SV,  
541 Larkin L, Hayworth CR, Richardson A, Van Remmen H (2010). Increased superoxide  
542 in vivo accelerates age-associated muscle atrophy through mitochondrial  
543 dysfunction and neuromuscular junction degeneration. *FASEB journal : official  
544 publication of the Federation of American Societies for Experimental Biology*. **24**,  
545 1376-1390.
- 546 Joseph AM, Adhihetty PJ, Leeuwenburgh C (2015). Beneficial effects of exercise on age-  
547 related mitochondrial dysfunction and oxidative stress in skeletal muscle. *The  
548 Journal of physiology*.
- 549 Konopka AR, Sreekumaran Nair K (2013). Mitochondrial and skeletal muscle health with  
550 advancing age. *Molecular and cellular endocrinology*. **379**, 19-29.
- 551 Koves TR, Ussher JR, Noland RC, Slentz D, Mosedale M, Ilkayeva O, Bain J, Stevens R, Dyck  
552 JR, Newgard CB, Lopaschuk GD, Muoio DM (2008). Mitochondrial overload and  
553 incomplete fatty acid oxidation contribute to skeletal muscle insulin resistance. *Cell  
554 Metab*. **7**, 45-56.
- 555 Lee S, Leone TC, Rogosa L, Rumsey J, Ayala J, Coen PM, Fitts RH, Vega RB, Kelly DP (2017).  
556 Skeletal muscle PGC-1beta signaling is sufficient to drive an endurance exercise  
557 phenotype and to counteract components of detraining in mice. *American journal of  
558 physiology. Endocrinology and metabolism*. **312**, E394-E406.
- 559 Li YP, Chen Y, Li AS, Reid MB (2003). Hydrogen peroxide stimulates ubiquitin-conjugating  
560 activity and expression of genes for specific E2 and E3 proteins in skeletal muscle  
561 myotubes. *Am J Physiol Cell Physiol*. **285**, C806-812.
- 562 Magne H, Savary-Auzeloux I, Vazeille E, Claustre A, Attaix D, Anne L, Veronique SL, Philippe  
563 G, Dardevet D, Combaret L (2011). Lack of muscle recovery after immobilization in  
564 old rats does not result from a defect in normalization of the ubiquitin-proteasome  
565 and the caspase-dependent apoptotic pathways. *J Physiol*. **589**, 511-524.
- 566 Masiero E, Sandri M (2010). Autophagy inhibition induces atrophy and myopathy in adult  
567 skeletal muscles. *Autophagy*. **6**, 307-309.



- 568 Min K, Smuder AJ, Kwon OS, Kavazis AN, Szeto HH, Powers SK (2011). Mitochondrial-  
569 targeted antioxidants protect skeletal muscle against immobilization-induced  
570 muscle atrophy. *Journal of applied physiology*. **111**, 1459-1466.
- 571 Morey-Holton ER, Globus RK (2002). Hindlimb unloading rodent model: technical aspects.  
572 *Journal of applied physiology*. **92**, 1367-1377.
- 573 Murton AJ, Marimuthu K, Mallinson JE, Selby AL, Smith K, Rennie MJ, Greenhaff PL (2015).  
574 Obesity Appears to Be Associated With Altered Muscle Protein Synthetic and  
575 Breakdown Responses to Increased Nutrient Delivery in Older Men, but Not  
576 Reduced Muscle Mass or Contractile Function. *Diabetes*. **64**, 3160-3171.
- 577 Ostojic O, O'Leary MF, Singh K, Menzies KJ, Vainshtein A, Hood DA (2013). The effects of  
578 chronic muscle use and disuse on cardioprotein metabolism. *Journal of applied  
579 physiology*. **114**, 444-452.
- 580 Paradies G, Paradies V, Ruggiero FM, Petrosillo G (2014). Cardioprotein and mitochondrial  
581 function in health and disease. *Antioxidants & redox signaling*. **20**, 1925-1953.
- 582 Park SW, Goodpaster BH, Lee JS, Kuller LH, Boudreau R, de Rekeneire N, Harris TB,  
583 Kritchevsky S, Tyllavsky FA, Nevitt M, Cho YW, Newman AB, Health A, Body  
584 Composition S (2009). Excessive loss of skeletal muscle mass in older adults with  
585 type 2 diabetes. *Diabetes care*. **32**, 1993-1997.
- 586 Picard M, Taivassalo T, Ritchie D, Wright KJ, Thomas MM, Romestaing C, Hepple RT (2011).  
587 Mitochondrial structure and function are disrupted by standard isolation methods.  
588 *PLoS One*. **6**, e18317.
- 589 Powers SK, Wiggs MP, Duarte JA, Zergeroglu AM, Demirel HA (2012). Mitochondrial  
590 signaling contributes to disuse muscle atrophy. *American journal of physiology.  
591 Endocrinology and metabolism*. **303**, E31-39.
- 592 Romanello V, Guadagnin E, Gomes L, Roder I, Sandri C, Petersen Y, Milan G, Masiero E, Del  
593 Piccolo P, Foretz M, Scorrano L, Rudolf R, Sandri M (2010). Mitochondrial fission  
594 and remodelling contributes to muscle atrophy. *The EMBO journal*. **29**, 1774-1785.
- 595 Romanello V, Sandri M (2010). Mitochondrial biogenesis and fragmentation as regulators  
596 of muscle protein degradation. *Current hypertension reports*. **12**, 433-439.
- 597 Rosenberg IH (1989). Epidemiologic and methodologic problems in determining  
598 nutritional status of older persons. Proceedings of a conference. Albuquerque, New  
599 Mexico, October 19-21, 1988. *The American journal of clinical nutrition*. **50**, 1121-  
600 1235.
- 601 Sandri M, Lin J, Handschin C, Yang W, Arany ZP, Lecker SH, Goldberg AL, Spiegelman BM  
602 (2006). PGC-1alpha protects skeletal muscle from atrophy by suppressing FoxO3  
603 action and atrophy-specific gene transcription. *Proceedings of the National Academy  
604 of Sciences of the United States of America*. **103**, 16260-16265.
- 605 Smuder AJ, Kavazis AN, Hudson MB, Nelson WB, Powers SK (2010). Oxidation enhances  
606 myofibrillar protein degradation via calpain and caspase-3. *Free Radic Biol Med*. **49**,  
607 1152-1160.
- 608 Stephens FB, Chee C, Wall BT, Murton AJ, Shannon CE, van Loon LJ, Tsintzas K (2015).  
609 Lipid-induced insulin resistance is associated with an impaired skeletal muscle  
610 protein synthetic response to amino acid ingestion in healthy young men. *Diabetes*.  
611 **64**, 1615-1620.
- 612 Suetta C, Frandsen U, Mackey AL, Jensen L, Hvid LG, Bayer ML, Petersson SJ, Schroder HD,  
613 Andersen JL, Aagaard P, Schjerling P, Kjaer M (2013). Ageing is associated with



614           diminished muscle re-growth and myogenic precursor cell expansion early after  
615           immobility-induced atrophy in human skeletal muscle. *J Physiol.* **591**, 3789-3804.  
616 Talbert EE, Smuder AJ, Min K, Kwon OS, Szeto HH, Powers SK (2013). Immobilization-  
617           induced activation of key proteolytic systems in skeletal muscles is prevented by a  
618           mitochondria-targeted antioxidant. *Journal of applied physiology.* **115**, 529-538.  
619 Zarzhevsky N, Carmeli E, Fuchs D, Coleman R, Stein H, Reznick AZ (2001). Recovery of  
620           muscles of old rats after hindlimb immobilisation by external fixation is impaired  
621           compared with those of young rats. *Experimental gerontology.* **36**, 125-140.

622

623

624

625

626

627

628

629

630

631

632

633

634

635 **Figure 1. Old mice do not recover muscle mass following 10 days of hind limb unloading**  
636 **and 3 days of recovery, compared to adult mice.** Panel A; image of the hind limb unloading  
637 approach. Panel B; body weight was greater for the old mice and both adult and old mice lost  
638 weight during the unloading and reloading periods. Panel C, average daily food intake was  
639 similar for both old and adult mice and did not change over the unloading and reloading periods.  
640 Panels D, E and F; Soleus, Gastrocnemius and Quadriceps atrophy during unloading in both  
641 adult and old mice. However, after 3 days of reloading, muscle mass did not recover in the old  
642 mice. n = 11 per group. Data are presented as mean  $\pm$  SEM. \*\* P <0.05 ANOVA/Bonferoni  
643 Correction. \* P <0.05 v Control ANOVA/Bonferoni Correction.

644 **Figure 2. Old mice are insulin resistant and have lower muscle glucose clearance, a**  
645 **phenotype that is exacerbated by unloading and reloading.** Grey bars represent control  
646 conditions. Green bars represent animals that had 10 days of unloading and 5 days of recovery.  
647 Panel A, blood glucose reductions (percent change from baseline) following intraperitoneal  
648 insulin injection. Panel B, The slope of the fall in glucose levels from t = 0 to 15 min was used as  
649 an index of whole-body insulin action. Panel C, Soleus glucose clearance. Panel D,  
650 Gastrocnemius glucose clearance. Panel E, proportion of body fat mass determined by NMR.  
651 Panel F, proportion of body lean mass determined by NMR. Panel G, day and night cage  
652 ambulatory activity (x,y,z) using the Promethion Mouse Multiplexed Metabolic System. n = 5  
653 per group. Data are presented as mean  $\pm$  SEM. The letters A and B denote significant differences  
654 between group/time points (P < 0.05, ANOVA/Tukey Correction).

655 **Figure 3. Mediators of protein synthesis are inhibited and breakdown are activated during**  
656 **unloading, a response that does not return to baseline following reloading in the old mice.**  
657 Panel A, protein synthesis signaling: pAKT/AKT, pmTOR/mTOR, and pS6/S6 ratios. Panel B,

658 protein breakdown signaling: pFOXO3a/FOXO3a ratio, Atrogin 1, and Murf 1 expression. Panel  
659 C, autophagy/mitophagy proteins: LC3B I/II ratio, ATG7, Pink 1, Beclin 1 expression. n = 5 per  
660 group. Data are presented as mean  $\pm$  SEM. \*\* P <0.05 ANOVA/Bonferoni Correction. \* P <0.05  
661 v Control ANOVA/Bonferoni Correction.

662 **Figure 4. Mitochondrial function is impaired during unloading and improves during**  
663 **recovery only in adult mice.** Panel A, Complex I supported LEAK (CI<sub>L</sub> or State 4) respiration.  
664 Panel B, Palmitoylcarnitine supported OXPHOS (State 3) respiration. Panel C, Complex I  
665 supported OXPHOS respiration. Panel D, Complex I&II supported OXPHOS respiration. n = 8-  
666 10 per group for respiration experiments. Panel E, Mitochondrial H<sub>2</sub>O<sub>2</sub> emission. n = 8 – 10 per  
667 group. Panel F, Mitochondrial calcium retention capacity. n = 8 – 10 per group. Panel G, Total  
668 OXPHOS protein content by immunoblot. n = 5 per group. Panel H, Total cardiolipin content by  
669 tandem mass spectrometry. Panel I, heat map depicting change in individual immature, mature  
670 and remodeled cardiolipin species. n = 7 per group. Panel J, Representative immunoblot for  
671 OXPHOS proteins. Data are presented as mean  $\pm$  SEM. \*\* P <0.05 ANOVA/Bonferoni  
672 Correction. \* P <0.05 v Control ANOVA/Bonferoni Correction.

673 **Figure 5. Acylcarnitine, organic acid and amino acid profiles during unloading and**  
674 **reloading.** Panel A, Acylcarnitine profile in soleus of adult and old mice during control,  
675 unloading and reloading conditions. Acyl chain length and degree of saturation are denoted by  
676 the numbers. Panel B, metabolite profiles showing lactate and pyruvate and organic acid  
677 intermediates of the tricarboxylic acid (TCA) cycle. Panel C, amino acids in soleus of adult and  
678 old mice during control, unloading and reloading conditions. BLQ = below limit of  
679 quantification. n = 6 per group. Data are presented as mean  $\pm$  SEM. \*\* P <0.05  
680 ANOVA/Bonferoni Correction. \* P <0.05 v Control ANOVA/Bonferoni Correction.

681 **Figure 6. Comparative analysis of transcriptomic and metabolomics profiles during**  
682 **unloading and reloading.** Panel A, qRT-PCR assay for expression of key nuclear transcription  
683 factors that drive mitochondrial energy metabolism. Panel B, heat map containing RNA  
684 sequencing data set representing the level of expression of genes with reads per kilobase per  
685 million mapped reads (RPKM) >1, plotted as a centralized Z-score for each gene in fatty acid  
686 metabolism, tricarboxylic acid (TCA) cycle, and electron transport chain/oxidative  
687 phosphorylation pathways defined by Ingenuity Pathway analysis. Panel C, heat map containing  
688 the levels of acylcarnitines, organic acids, amino acids, pyridine and adenine nucleotides and  
689 total level of free fatty acids (FFA), diacylglycerol (DAG) and triacylglycerol (TAG). For all  
690 heat maps, relative downregulation is in blue and upregulation in red. The intensity of color  
691 indicates the magnitude of the change.

FIGURE 1

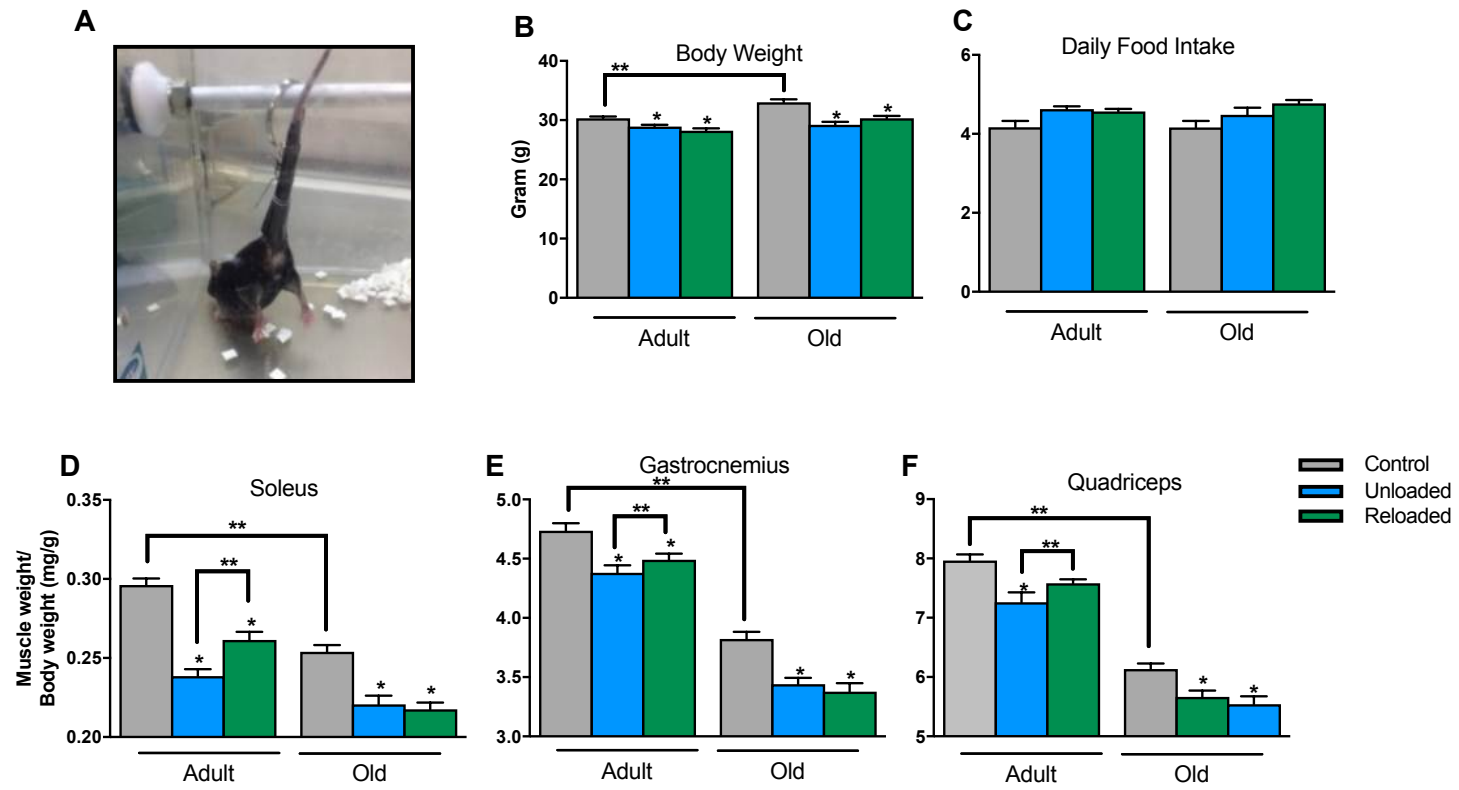

**FIGURE 2**

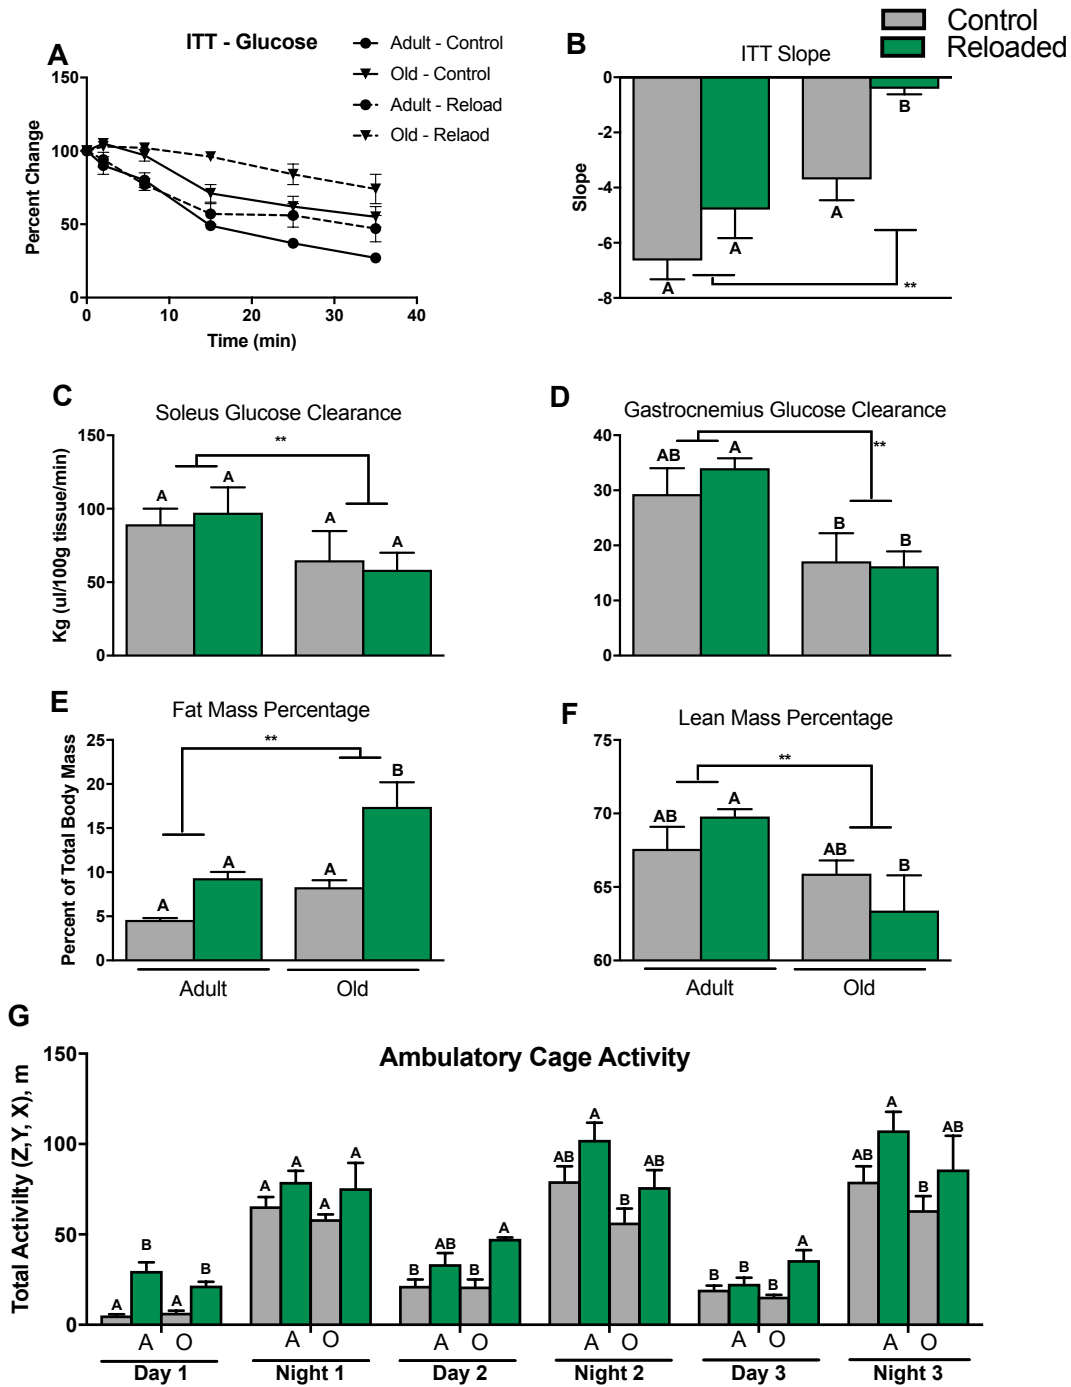

**FIGURE 3**

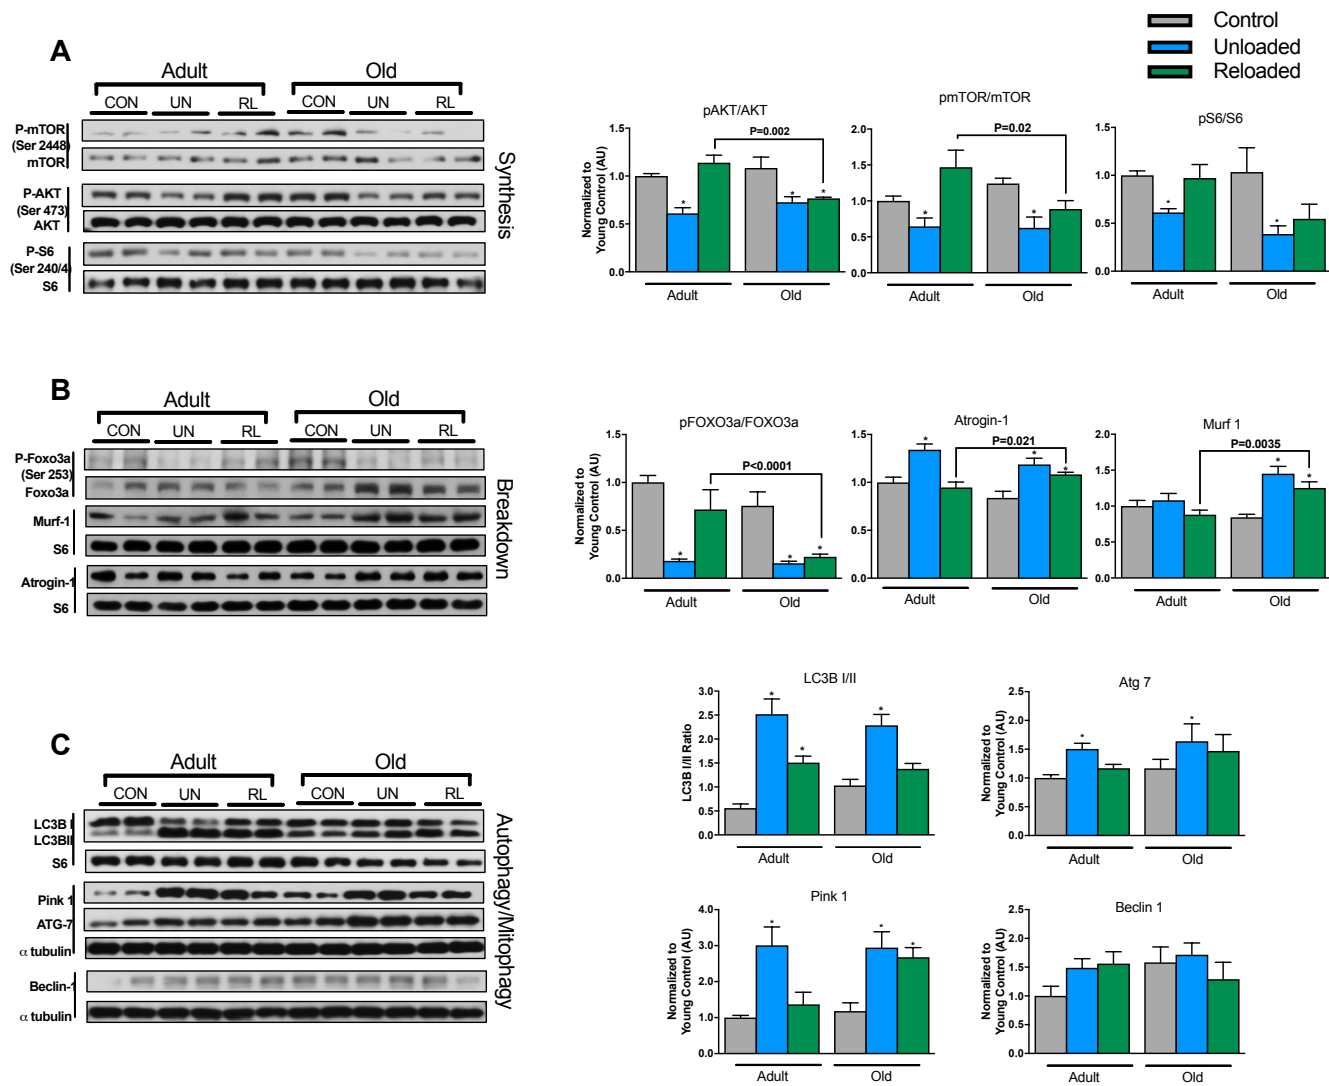

**FIGURE 4**

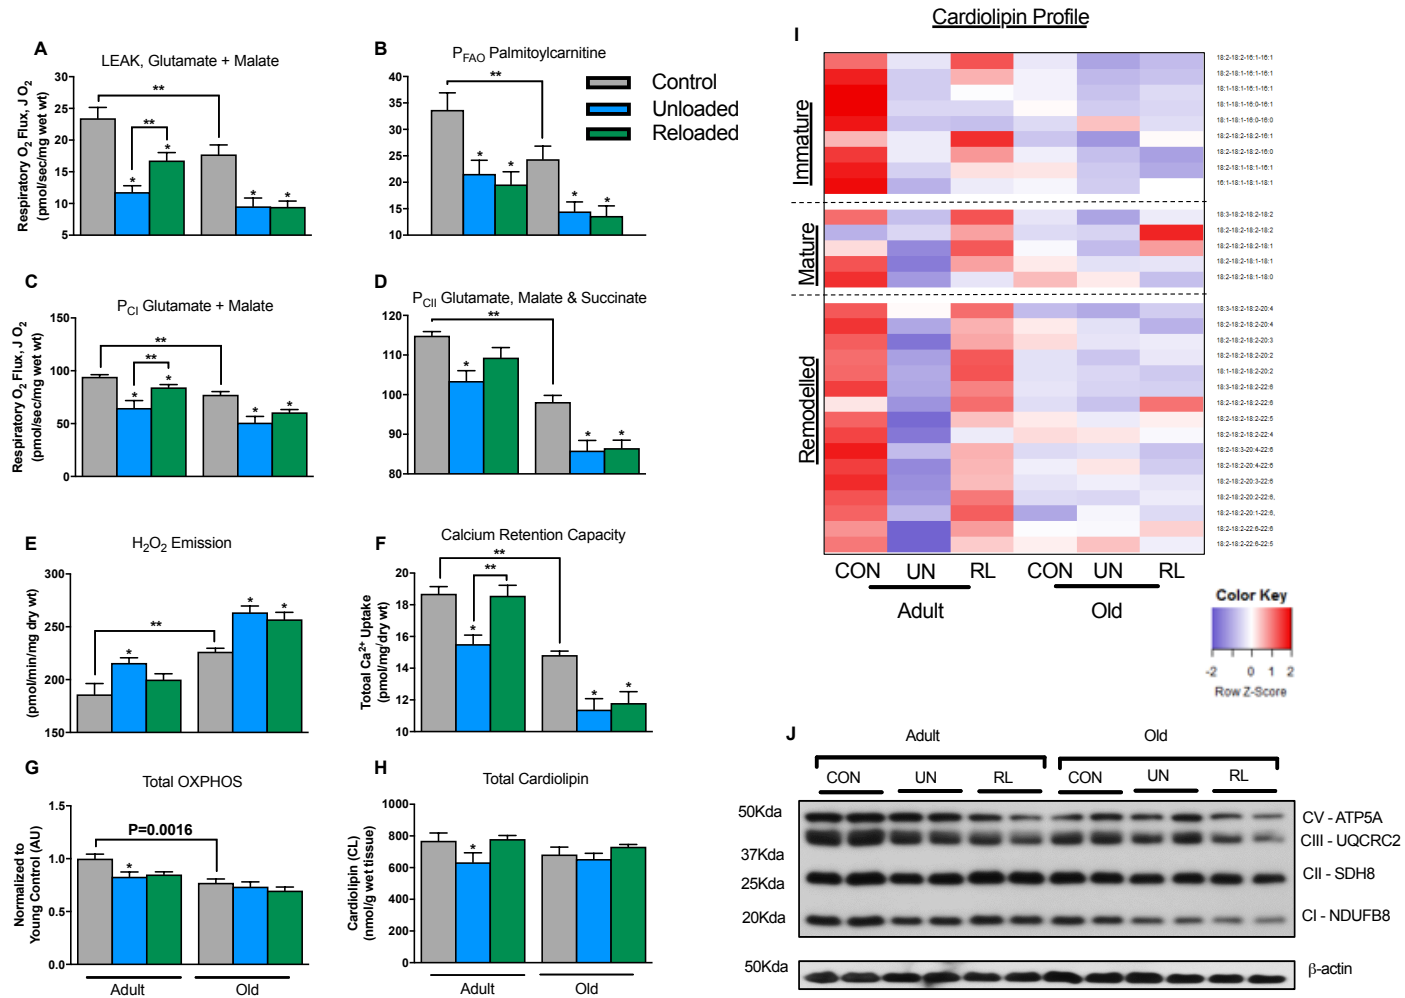



**FIGURE 5**

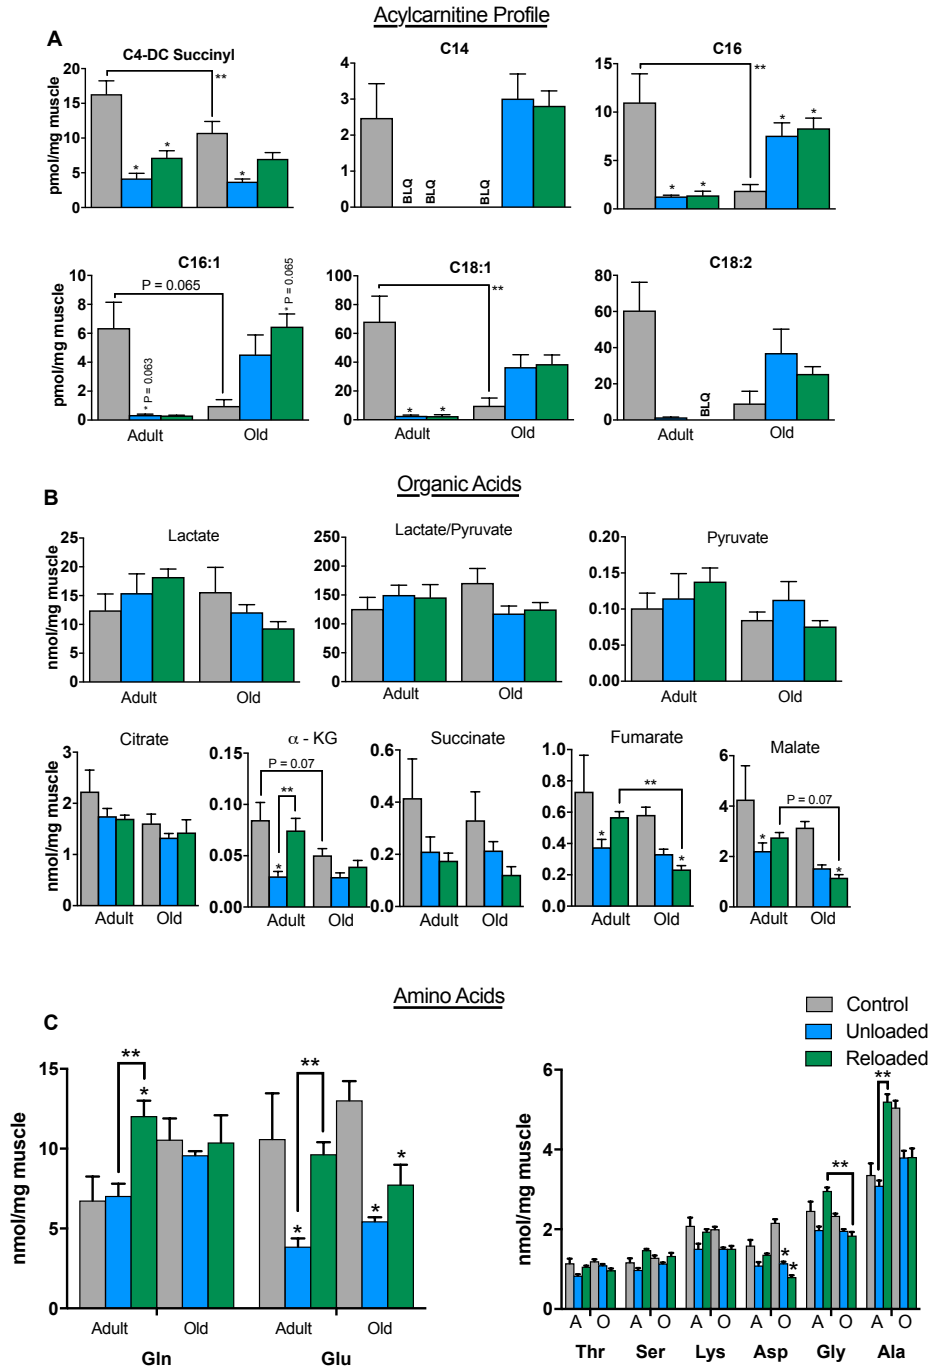

**FIGURE 6**

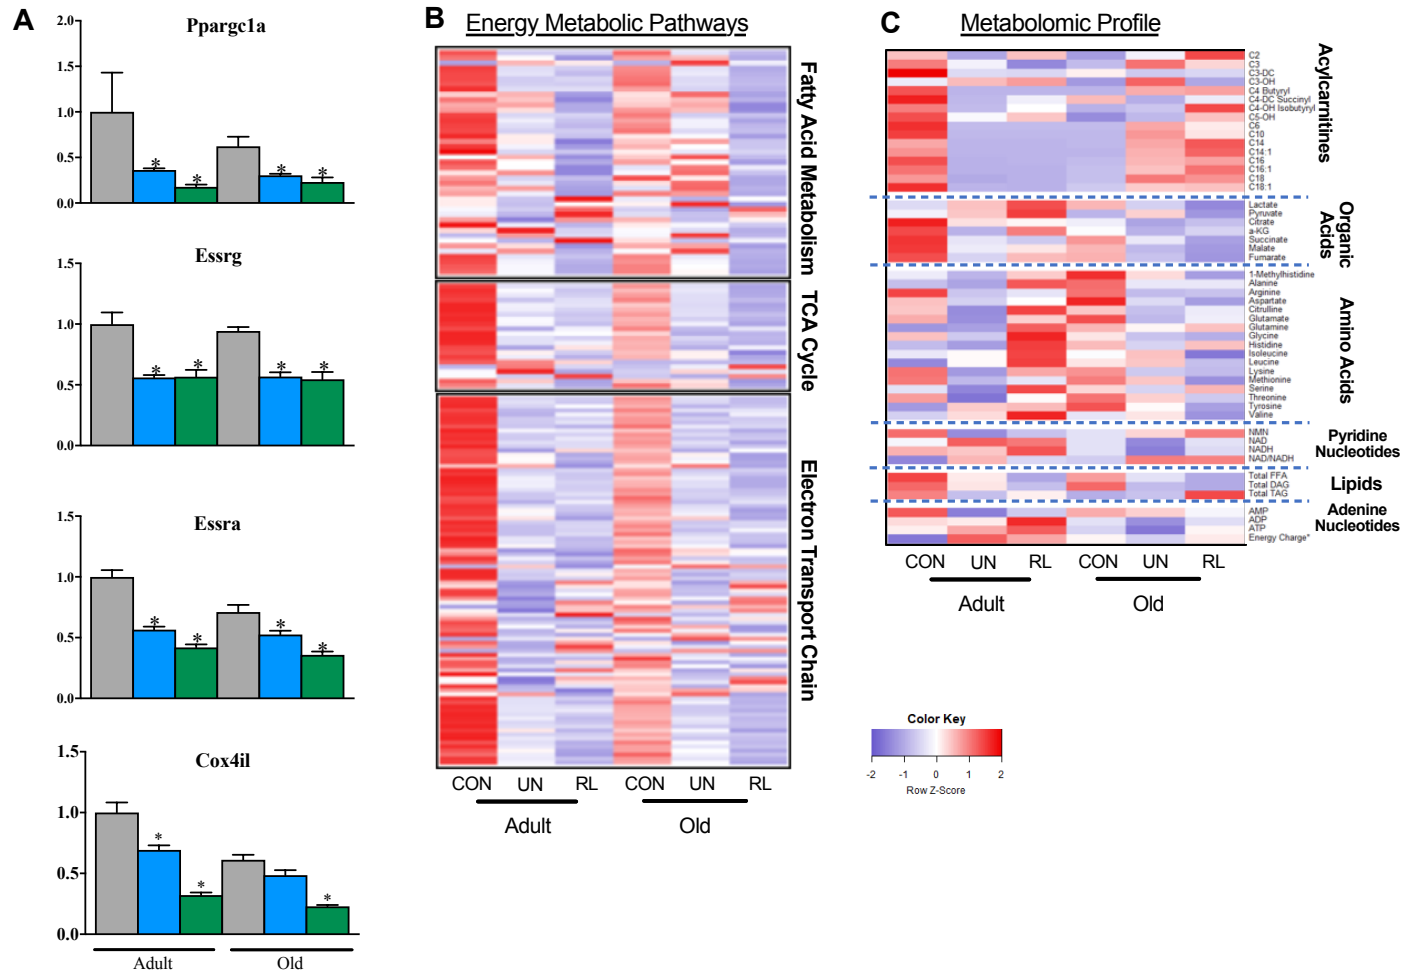

Source: http://biorxiv.org/content/10.1101/183244v1.full.pdf
